# Supplementary material for: Influence of H2-ICE specific exhaust conditions on the activity and stability of Cu-SSZ-13 deNOx catalysts
Source: Royal Society of Chemistry journal article supplement (doi:10.1039/d5cy00095e), 2025-01-01
Supplement: d5cy00095e1.pdf [file d5cy00095e1.pdf]

**Supplementary Information**

**Influence of H<sub>2</sub>-ICE exhaust on the activity and stability of Cu-SSZ-13 deNO<sub>x</sub> catalysts**

Dhruba J. Deka <sup>a,\*</sup>, Kenneth G. Rappé <sup>a</sup>, Eric Walter <sup>a</sup>, Garam Lee <sup>[a]</sup>, Janos Szanyi <sup>a</sup>,

Yong Wang <sup>a, b</sup>

<sup>a</sup> Institute for Integrated Catalysis, Pacific Northwest National Laboratory, Richland, WA 99354,  
USA.

<sup>b</sup> The Gene and Linda Voiland School of Chemical Engineering and Bioengineering,  
Washington State University, Pullman, WA 99163, USA.

\* Corresponding author's email: [dhrubajyoti.deka@pnnl.gov](mailto:dhrubajyoti.deka@pnnl.gov)

## Note S1: Experimental methods

### *Catalyst synthesis and aging:*

An aqueous phase exchange of Cu-ions with  $\text{NH}_4$ -form SSZ-13 ( $\text{Si}/\text{Al} = 12$ ) was performed to prepare Cu-SSZ-13 catalysts. To synthesize the zeolite support, NaOH (0.8 g, Sigma-Aldrich) was first dissolved in deionized water (38 g) to which N,N,N-trimethyl-1- adamantyl ammonium hydroxide (17 g, TMAH-OH, Sachem Inc., 25%) was added.  $\text{Al}(\text{OH})_3$  (1.6 g, Aldrich) containing around ~54%  $\text{Al}_2\text{O}_3$  was then slowly added to the solution under constant stirring to ensure a homogenous mixture. Colloidal silica (40 g, AS-30, Sigma-Aldrich) was then added to the mixture which was left under constant stirring for 2 hours. The resulting mixture was sealed in a Teflon-lined stainless-steel autoclave which was kept at 165 °C for 4 days under constant stirring to carry out hydrothermal synthesis of Na-SSZ-13. The solid zeolite was separated from the rest of the suspension via centrifugation and washed 3 times with DI water prior to calcination under stagnant air at 650 °C for 5 hours. The Na-SSZ-13 formed this way was converted into  $\text{NH}_4$ -SSZ-13 by substituting  $\text{Na}^+$ -ions with  $\text{NH}_4^+$ -ions via three-time aqueous phase ion exchange with 0.1 M  $\text{NH}_4\text{NO}_3$  (Sigma-Aldrich) solution at 80 °C for 2 hours. Finally, Cu-SSZ-13 was prepared by aqueous phase ion exchange of  $\text{NH}_4$ -SSZ-13 with 0.1 M  $\text{Cu}(\text{NO}_3)_2$  (Sigma-Aldrich) solution at 80 °C under constant stirring for 4 hours. The solid sample was separated by centrifugation, followed by 3-times washing with DI water. The elemental composition of as-synthesized catalysts was determined as 2.18 wt% Cu,  $\text{Cu}/\text{Al} \sim 0.33$ , and  $\text{Si}/\text{Al} \sim 12$  by inductively coupled plasma atomic emission spectroscopy (ICP-AES) performed at Galbraith Laboratories, Knoxville, Tennessee.

The fresh sample (FR) synthesized this way was hydrothermally aged at 650 °C for 50 hours under three different gaseous environments: (1) 6%  $\text{H}_2\text{O}$  in air balance, (2) 20%  $\text{H}_2\text{O}$  in air balance and (3) 20%  $\text{H}_2\text{O} + 1000 \text{ ppm } \text{H}_2$  in air balance. The resulting samples are referred to as HTA-1, HTA-2 and HTA-3, respectively.

### *SCR activity experiments:*

A plug flow reactor consisting of a vertically mounted quartz tube housing ~20 mg of catalyst powder (sieved in 60-80 mesh particle size) mixed with 450 mg  $\text{SiO}_2$  was utilized for Standard SCR activity testing. A tubular furnace (Applied Test Systems) controlled with PID

controller (Omega model CN3251) was used to heat the catalyst where the temperature was controlled off a K-type thermocouple placed directly above the catalyst bed. Reactant gases were supplied from gas cylinders (Oxarc Inc., Spokane, Washington) via Brooks 5850E series mass flow controllers at appropriate flow rates to create a synthetic exhaust mixture at  $\sim 0.5 \text{ Lmin}^{-1}$  flowrate containing 350 ppm NO, 350 ppm NH<sub>3</sub>, 10% O<sub>2</sub>, and varying H<sub>2</sub>O in N<sub>2</sub> balance (H<sub>2</sub>O supplied through a heated Perma Pure MH<sup>TM</sup>-series humidifier). Five different H<sub>2</sub>O concentrations were used: 0%, 3%, 6%, 10% and 20% to evaluate the impact of H<sub>2</sub>O on SCR activity. Moreover, influence of H<sub>2</sub> was investigated by supplying 0, 200, 1000 and 4000 ppm H<sub>2</sub> into the reactor feed gas. Steady state SCR experiments were performed by heating the catalyst to 500 °C and cooling down to desired temperatures with sufficient hold time at each temperature to achieve steady state. NO<sub>x</sub> conversion was calculated based on the following equation:

$$\text{NO}_x \text{ Conversion (\%)} = \frac{(NO + NO_2)_{inlet} - (NO + NO_2)_{outlet}}{(NO + NO_2)_{inlet}} \times 100$$

The SCR activity data was further analyzed utilizing a first order kinetic equation,

$$r = \frac{F}{W} (-\ln(1 - X))$$

, where F is NO<sub>x</sub> flow rate (mol/s), W is catalyst amount (g) and X is fractional

NO<sub>x</sub> conversion. The Arrhenius equation,  $k = \frac{r}{[NO]_0} = Ae^{-\frac{E_a}{RT}}$ , was used to calculate apparent activation energy ( $E_a$ ) and pre-exponential factor ( $A$ ), where  $[NO]_0$  is feed NO.

#### *Hydrogen temperature programmed reduction (H<sub>2</sub>-TPR):*

H<sub>2</sub>-TPR was performed on a Mcromeritics Autochem 2920 instrument equipped with TCD and a downstream external MKS Cirrus 2 quadrupole mass. Around  $\sim 100$  mg of sample was loaded into a U-tube quartz reactor. No oxidative pre-treatment was done on the sample prior to reduction to avoid auto-reduction of Cu sites and dehydration-induced condensation of Z-CuOH sites. The TPR was performed under 50 ccm 5% H<sub>2</sub>/N<sub>2</sub> flow while ramping the temperature from RT to 1000 °C at a 10 °C/min rate.

#### *Electron paramagnetic resonance:*

Around 20-30 mg of the hydrated samples were loaded into quartz sample tubes for measurement in a Bruker E580 X-band spectrometer. The continuous wave EPR spectra was collected between 2400 G and 3600 G, with a field modulation of 100 kHz, amplitude of 5 G, and microwave frequency of 9.32 GHz with 0.2 mW power. Spectra were collected at  $-150\text{ }^{\circ}\text{C}$ .

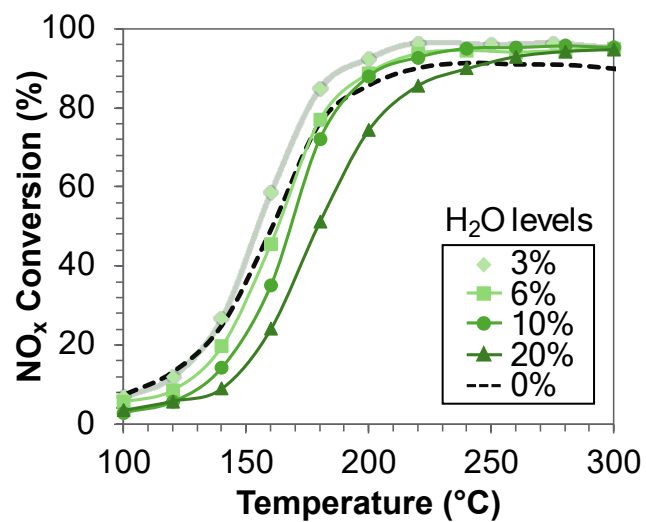

Figure S1: Steady state standard SCR NO<sub>x</sub> conversion at different feed H<sub>2</sub>O content (0, 3, 6, 10, 20%) on Cu-SSZ-13 catalysts. Feed conditions: 350 ppm NO, 350 ppm NH<sub>3</sub>, 10% O<sub>2</sub>, varying H<sub>2</sub>O, balance N<sub>2</sub>.

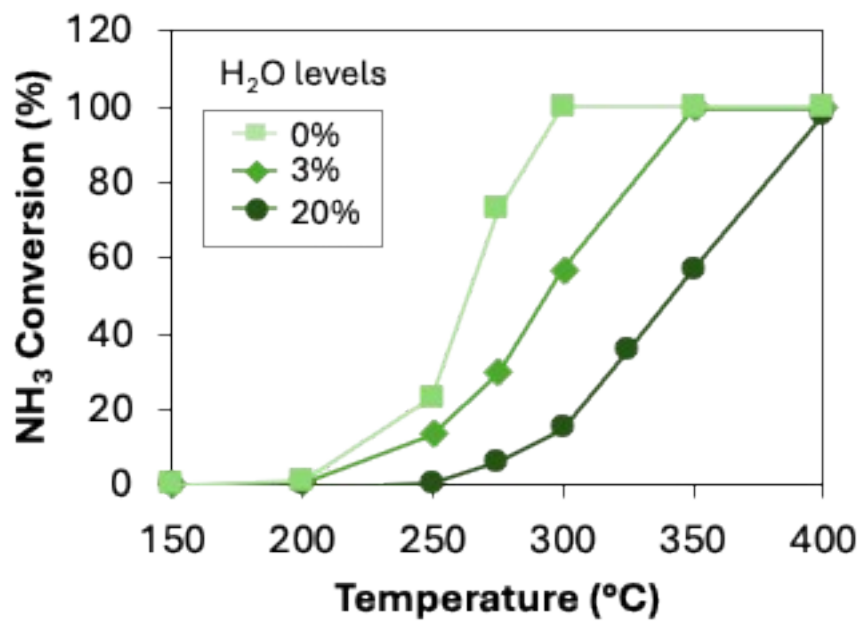

Figure S2: Steady state NH<sub>3</sub> conversion during NH<sub>3</sub> oxidation under 0%, 3% and 20% feed H<sub>2</sub>O content on Cu-SSZ-13. Feed conditions: 350 ppm NH<sub>3</sub>, 10% O<sub>2</sub>, varying H<sub>2</sub>O, balance N<sub>2</sub>.

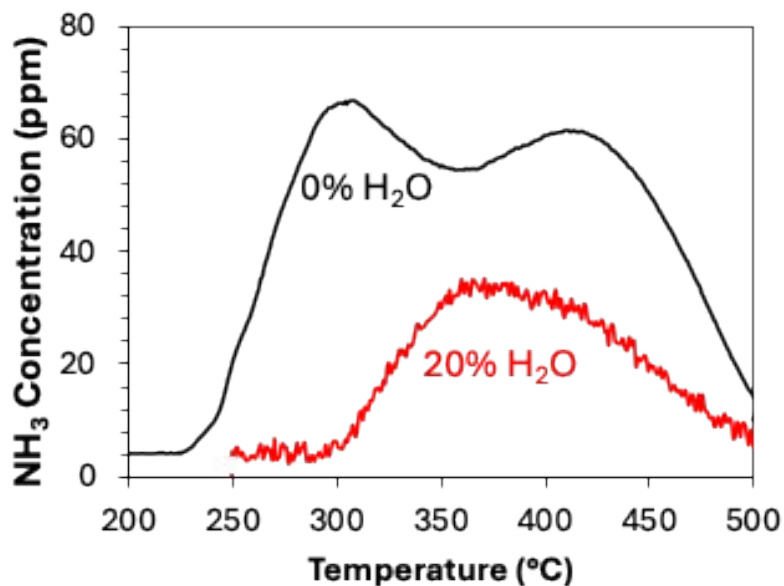

Figure S3: NH<sub>3</sub> evolution during NH<sub>3</sub> temperature-programmed desorption from Cu-SSZ-13 sample under 0% and 20% feed water levels. It is evident from the amount of NH<sub>3</sub> desorbed that the presence of H<sub>2</sub>O impedes NH<sub>3</sub> adsorption.

For these experiments, NH<sub>3</sub> was first adsorbed on 100 mg of catalyst by flowing 350 ppm NH<sub>3</sub> + 10% O<sub>2</sub> in N<sub>2</sub> balance (in presence or absence of H<sub>2</sub>O) at 200 °C, followed by a 90 mins isothermal flush with N<sub>2</sub>. Temperature-programmed desorption was carried out under N<sub>2</sub> flow by increasing the reactor temperature from 200 °C to 500 °C at a 3 °C/min ramp rate.

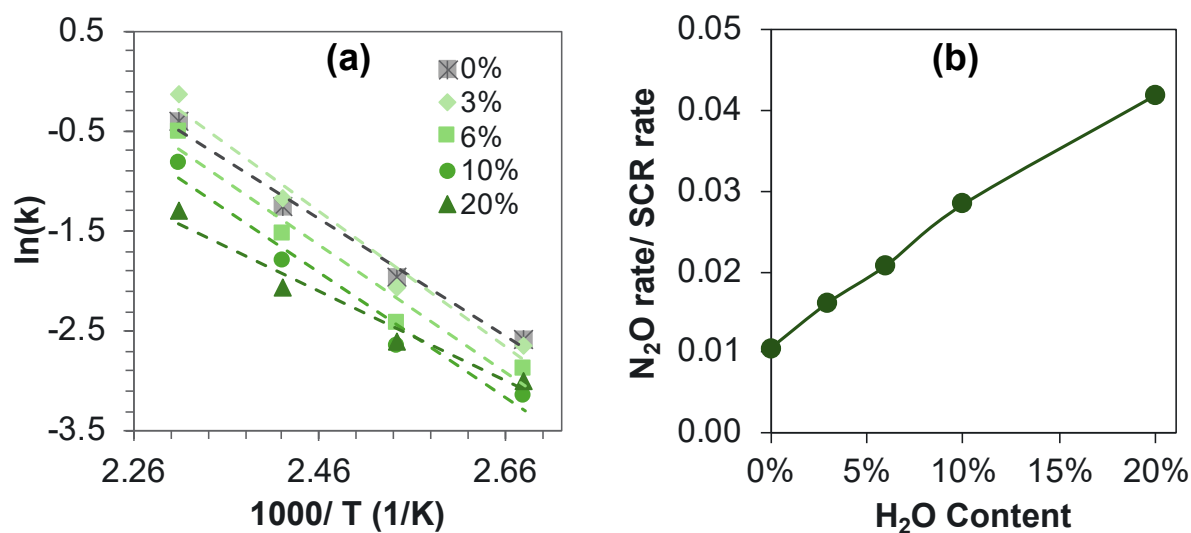

Figure S4: (a) Arrhenius plot [ $\ln(k)$  vs  $1/T$ ] obtained from SCR NO<sub>x</sub> conversion data shown in Fig. 1a and Fig. S1. Only those data points below 20% NO<sub>x</sub> conversion were used to obtain Arrhenius plot to stay within differential region. Slope of  $\ln(k)$  vs  $1/T$  plot provides activation energy while the y-intercept provides pre-exponential factors plotted in Fig. 1b and 1c. (b) N<sub>2</sub>O selectivity (rate of N<sub>2</sub>O formation divided by rate of NO<sub>x</sub> consumption by SCR, where rate: mol/min/g<sub>cat</sub>) plotted against feed H<sub>2</sub>O levels. Feed conditions: 350 ppm NO, 350 ppm NH<sub>3</sub>, 10% O<sub>2</sub>, varying H<sub>2</sub>O, balance N<sub>2</sub>.



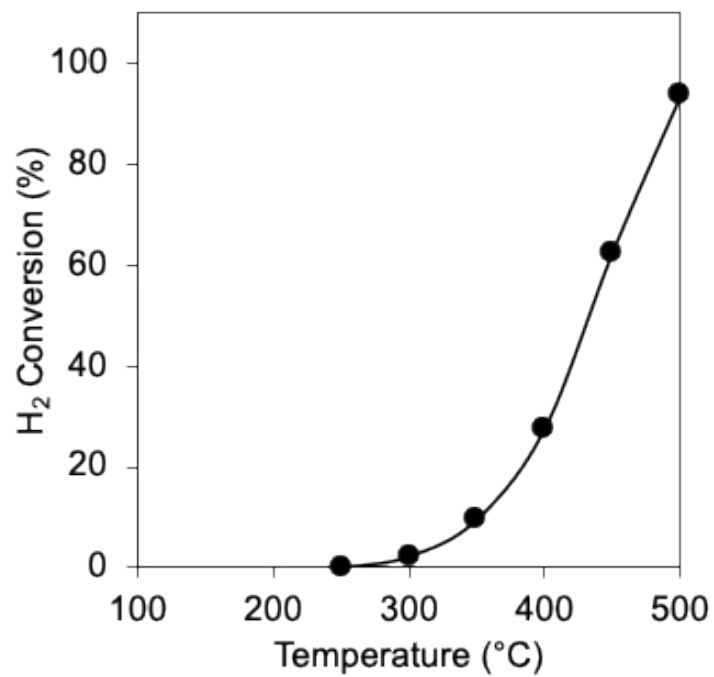

Figure S5: H<sub>2</sub> Conversion as a function of temperature on Cu-CHA catalysts. Feed: 0.4% H<sub>2</sub>, 10% O<sub>2</sub>, 10% H<sub>2</sub>O (120k/h space velocity).

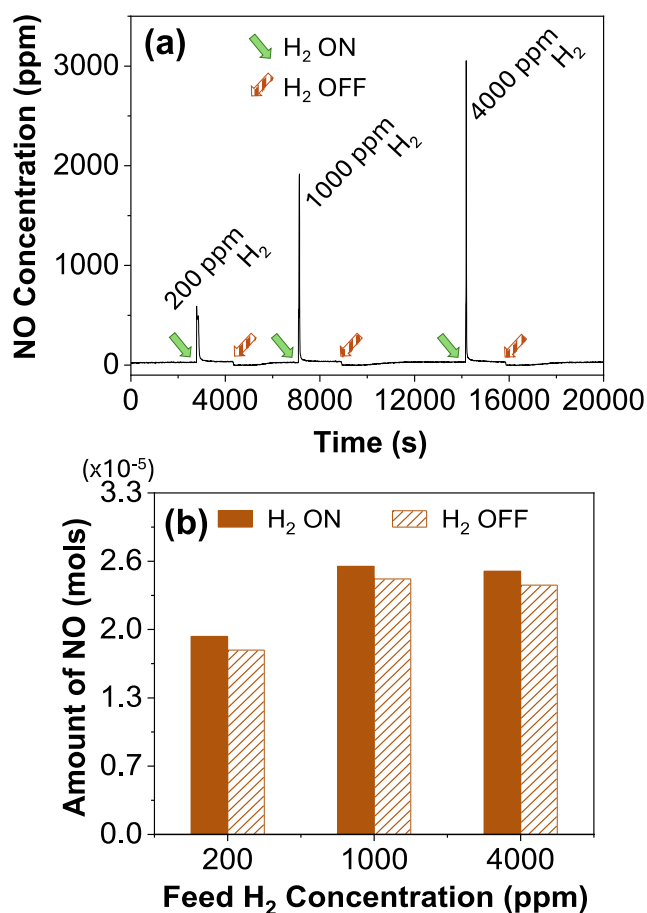

Figure S6: (a) NO concentration dynamics during SCR at 250°C when H<sub>2</sub> is turned ON or OFF. Green arrow indicates the point where H<sub>2</sub> is turned on while brown striped arrow indicates where H<sub>2</sub> is turned off. Three different H<sub>2</sub> concentrations were turned on which produces three NO spikes (200, 1000 and 4000 ppm H<sub>2</sub> at ~ 2800 s, ~7200 s and ~14200 s, respectively). Consumption of NO below steady state values were observed when H<sub>2</sub> was turned off after each concentration event. Areas under NO spikes (formed when H<sub>2</sub> is turned on) and NO consumption (formed when H<sub>2</sub> is turned off) were calculated and plotted on Fig. S5b. These two areas for each H<sub>2</sub> concentration are within 10% of each other. Feed conditions: 350 ppm NO, 350 ppm NH<sub>3</sub>, 10% O<sub>2</sub>, 20% H<sub>2</sub>O, varying H<sub>2</sub>, balance N<sub>2</sub>.

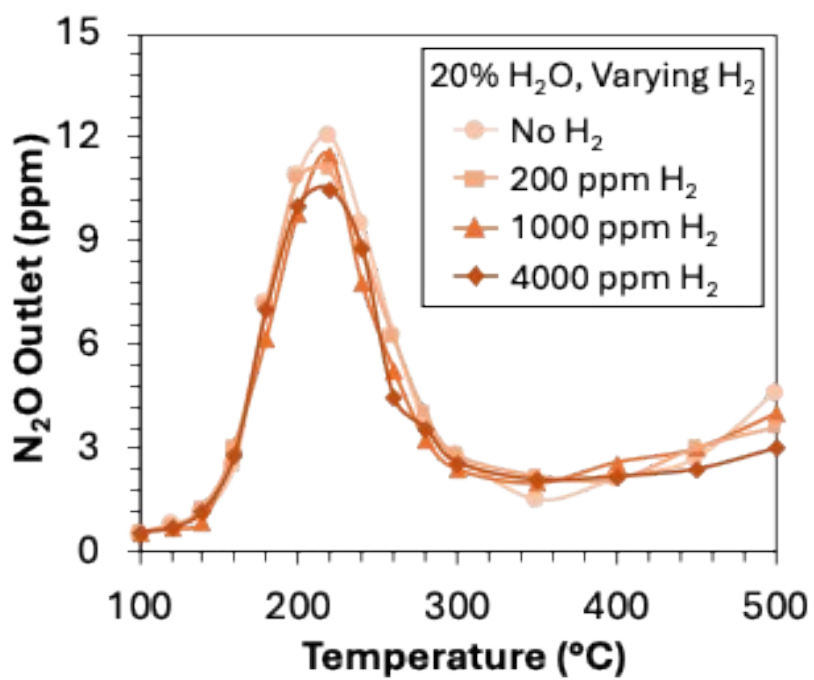

Figure S7: N<sub>2</sub>O byproduct formation during steady state standard SCR on fresh Cu-SSZ-13 catalyst under various feed H<sub>2</sub> content: 0, 200, 1000, 2000 ppm H<sub>2</sub>. Feed conditions: 350 ppm NO, 350 ppm NH<sub>3</sub>, 10% O<sub>2</sub>, 3% or 20% H<sub>2</sub>O, balance N<sub>2</sub>.

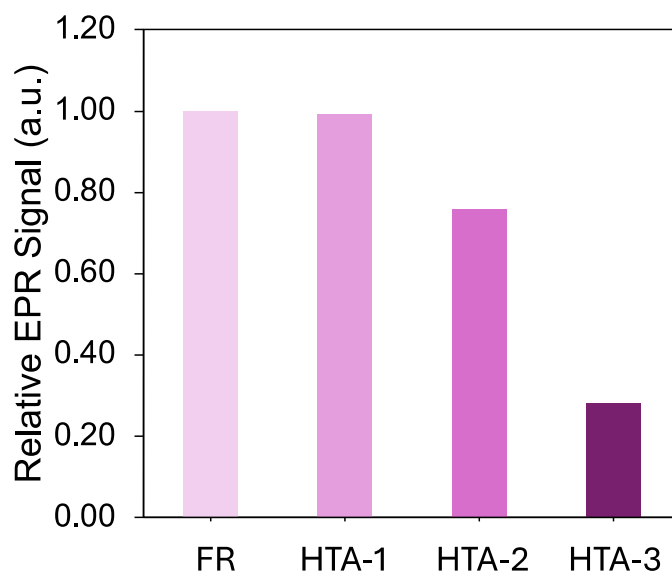

Figure S8: Total EPR signal of various Cu-SSZ-13 samples (FR, HTA-1, HTA-2, HTA-3) relative to the total EPR signal of the fresh (FR) sample.

All samples were in their hydrated and oxidized forms. Double integration of EPR signal can provide a straightforward measure of EPR active Cu sites, and the relative content of thus-calculated Cu sites in HTA-1, HTA-2 and HTA-3 compared to that of FR sample could provide a quantified measure of the lost isolated Cu sites in these catalysts. Consequently, HTA-1 has similar number of isolated Cu as FR, while it decreases by ~24% and ~72% in HTA-1 and HTA-2, respectively.
